# Supplementary material for: The synergetic effect of acid and nickel sites on bifunctional MWW zeolite catalysts for ethylene oligomerization and aromatization
Source: Royal Society of Chemistry journal article supplement (doi:10.1039/c9se00771g), 2019-01-01

### Supplementary Information

Table S1. Data of Nickel species site and acid sites in the series of MWW catalysts

| Catalysts    | Total acid amount (mmol/g) | Weak acid amount (mmol/g) | Strong acid amount (mmol/g) | Ni/Total acid amount (mmol/mol) | Ni/Weak acid amount (mmol/mmol) | Ni/Strong acid amount (mmol/mol) |
|--------------|----------------------------|---------------------------|-----------------------------|---------------------------------|---------------------------------|----------------------------------|
| H-MCM-22     | 0.840                      | 0.241                     | 0.599                       | -                               | -                               | -                                |
| Ni-MCM-22(1) | 0.708                      | 0.254                     | 0.454                       | 0.224                           | 0.570                           | 0.319                            |
| Ni-MCM-22(2) | 0.631                      | 0.210                     | 0.421                       | 0.648                           | 1.947                           | 0.971                            |
| H-ERB-1      | 0.292                      | 0.079                     | 0.213                       | -                               | -                               | -                                |
| Ni-ERB-1     | 0.302                      | 0.176                     | 0.126                       | 0.169                           | 0.308                           | 0.347                            |
| H-D-ERB-1    | 0.345                      | 0.125                     | 0.220                       | -                               | -                               | -                                |
| Ni-D-ERB-1   | 0.567                      | 0.221                     | 0.346                       | 0.120                           | 0.290                           | 0.197                            |
| H-D-MCM-22   | 0.618                      | 0.274                     | 0.344                       | -                               | -                               | -                                |
| Ni-D-MCM-22  | 0.699                      | 0.371                     | 0.328                       | 0.166                           | 0.312                           | 0.350                            |

Table S2. Average ethylene conversion of each catalyst (3 h reaction) under different reaction conditions

| Sample          | Reaction conditions | Average ethylene conversion (%) |
|-----------------|---------------------|---------------------------------|
| H-MCM-22        | 573 K; 2 MPa        | 57.27                           |
|                 | 723 K; 0.1 MPa      | 86.53                           |
| H-D-MCM-22      | 573 K; 2 MPa        | 33.88                           |
|                 | 723 K; 0.1 MPa      | 12.97                           |
| H-ERB-1         | 573 K; 2 MPa        | 0                               |
|                 | 723 K; 0.1 MPa      | 0                               |
| H-D-ERB-1       | 573 K; 2 MPa        | 0                               |
|                 | 723 K; 0.1 MPa      | 0                               |
| 0.85Ni-MCM-22   | 573 K; 0.1 MPa      | 8.45                            |
|                 | 573 K; 2 MPa        | 48.58                           |
|                 | 723 K; 0.1 MPa      | 82.00                           |
|                 | 723K; 0.4MPa        | 90.25                           |
| 2.4Ni-MCM-22    | 573 K; 2 MPa        | 56.59                           |
|                 | 723 K; 0.1 MPa      | 91.26                           |
| 0.68Ni-D-MCM-22 | 573 K; 2 MPa        | 25.15                           |
|                 | 723 K; 0.1 MPa      | 38.80                           |
| 0.3Ni-ERB-1     | 523 K; 2 MPa        | 13.72                           |
|                 | 573 K; 2 MPa        | 32.00                           |
|                 | 723 K; 0.1 MPa      | 0.85                            |
|                 | 723 K; 1MPa         | 2.37                            |
| 0.4Ni-D-ERB-1   | 723 K; 2 MPa        | 7.57                            |
|                 | 573 K; 2 MPa        | 12.49                           |
|                 | 573K; 2MPa          | 20.85                           |

This data was derived from NH<sub>3</sub>-TPD thermo gram and titration of the NH<sub>3</sub> desorption in the outlet gas. The thermo gram of the NH<sub>3</sub>-TPD was subjected to deconvolute to obtain the corresponding desorption peak area at five desorption temperatures, that is, the acid amount of the corresponding different acid intensity sites. The first two desorption peaks at lower temperature below about 600 K are corresponding to the weak acid, and the latter two peaks at higher temperature are corresponding to strong acid sites. As an example, the NH<sub>3</sub>-TPD spectrum deconvolution result of the different acid strength sites of Ni-MCM-22 is list as follows.

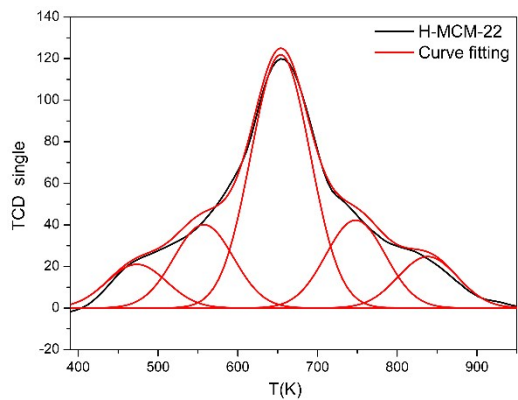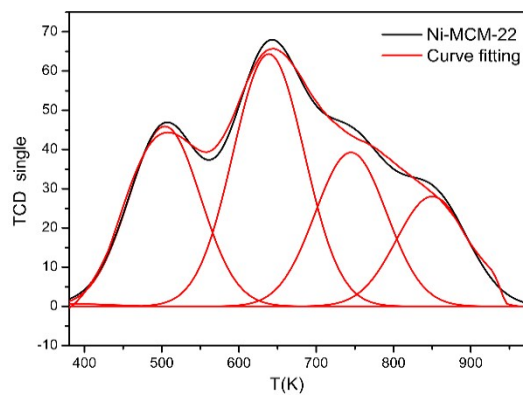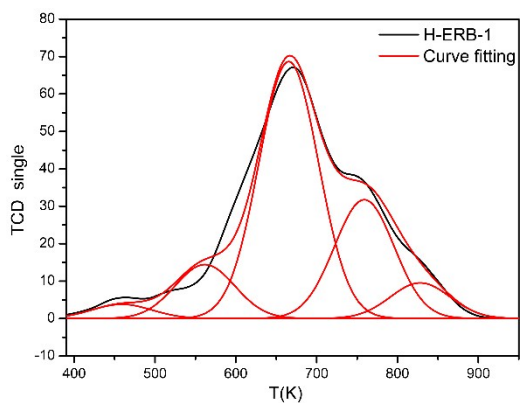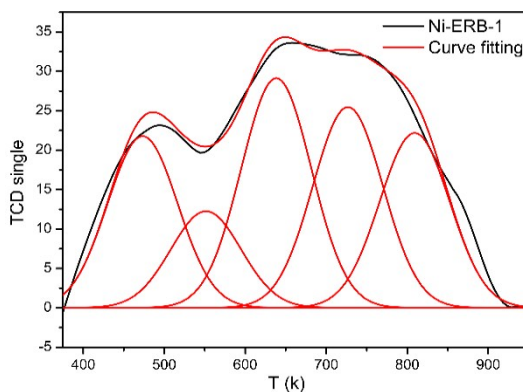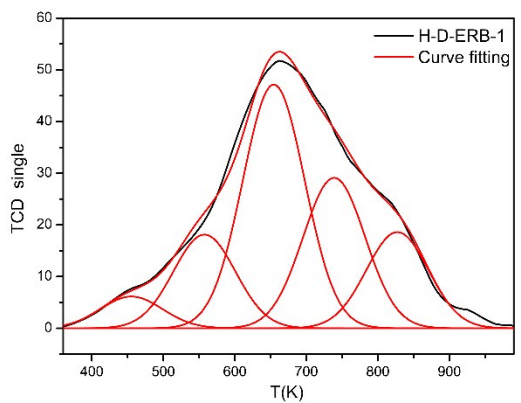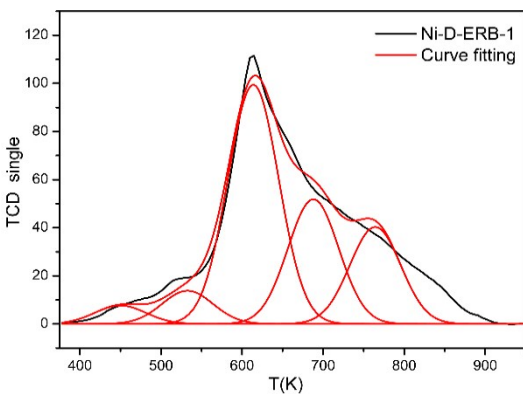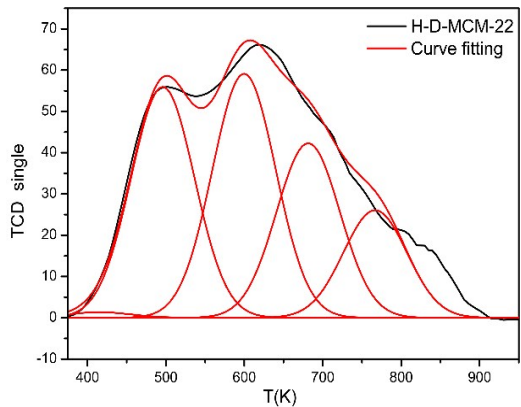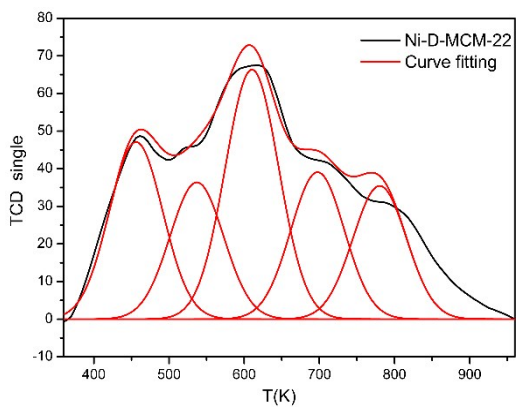

Supplement: c9se00771g1.pdf [file c9se00771g1.pdf]
